# Supplementary material for: Integration of ZnO/ZnS nanostructured materials into a cotton fabric platform
Source: Royal Society of Chemistry journal article supplement (doi:10.1039/c4ra12074d), 2014-01-01

### Graphical Abstract:

ZnO/ZnS core/shell nanorod arrays were integrated onto a cotton platform *via* a simple, low-temperature hydrothermal growth technique.

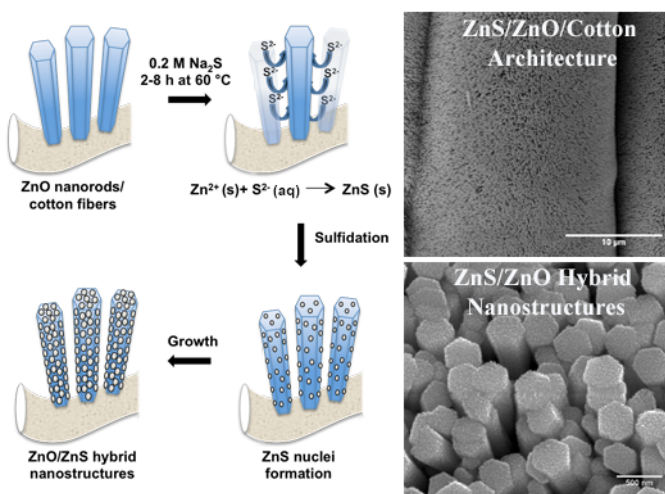

Supplement: c4ra12074d1.pdf [file c4ra12074d1.pdf]
